# Supplementary material for: Assessment of the Conventional Acid-Clay Method in Reclaiming Waste Crankcase Lubricating Oil
Source: Hindawi journal article supplement (doi:10.1155/2023/6567607), 2023-03-02
Supplement: f1 [file 6567607.f1.docx]

**APPENDIX**

| **Oil property** | **Fresh oil** | **Waste oil** | **Re-refined oil** |
| --- | --- | --- | --- |
| **Wear metals** |  |  |  |
| Iron | 1ppm | 23ppm | 0ppm |
| Aluminium | 0 | 2ppm | 0ppm |
|  |  |  |  |
| **Contaminants** |  |  |  |
| Potassium | 2ppm | 1ppm | 4ppm |
| Silicon | 6ppm | 6ppm | 6ppm |
| Sodium | 2ppm | 2ppm | 5ppm |
| Manganese | 0 | 140ppm | 123ppm |
| Oxidation | 13ppm | 18ppm | 17ppm |
| Nitrate | 10ppm | 16ppm | 15ppm |
| Sulphate | 21ppm | 27ppm | 27ppm |
| Fuel% | 0 | < 4% | < 1% |
| Water % | 0.000 | 0.010 | 0.000 |
| **Viscosity cST** |  |  |  |
| Viscosity @ 40oC | 104.5 | 104.0 | 105.6 |
| Viscosity @ 100oC | 13.9 | 13.5 | 13.5 |
| Viscosity index | 134 | 129 | 126 |
| TBN(mg/g) | 10.4 | 8.0 | 8.6 |
| TAN(mg/g) | 1.39 | 1.35 | 1.36 |
| Flash point (oC) | 205 | 192 | 204 |
